# Supplementary material
Source: ML conference proceedings conference paper supplement (https://openreview.net/forum?id=rfGNz_Uiqgq)

naip image

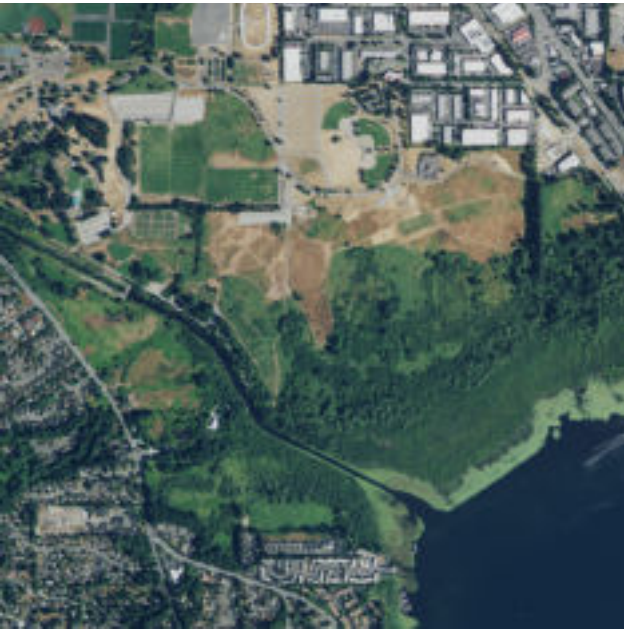

preds using cross-entropy loss on argmaxed prior

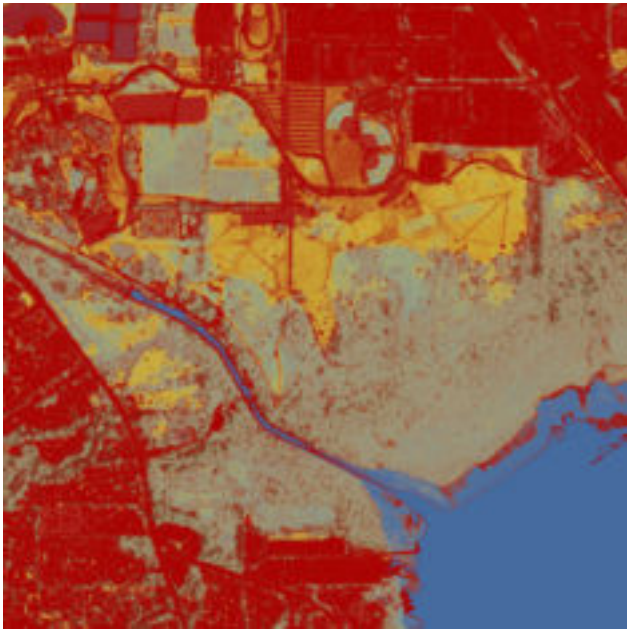

argmaxed prior

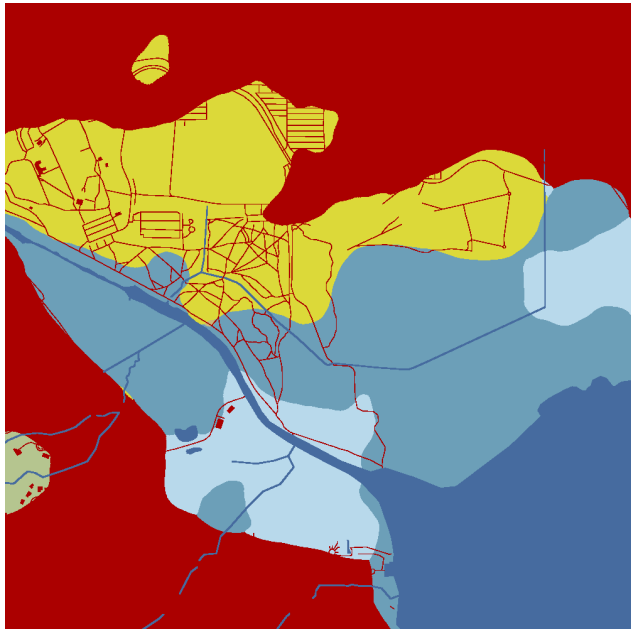

preds using cross-entropy loss on soft prior

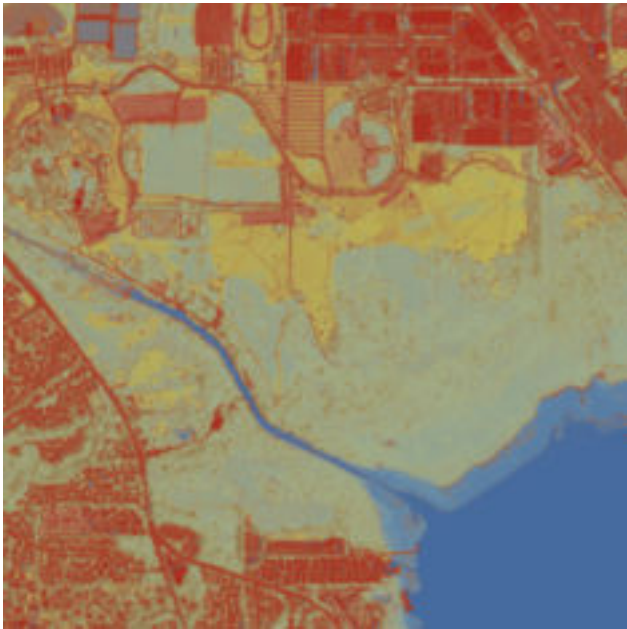

soft prior

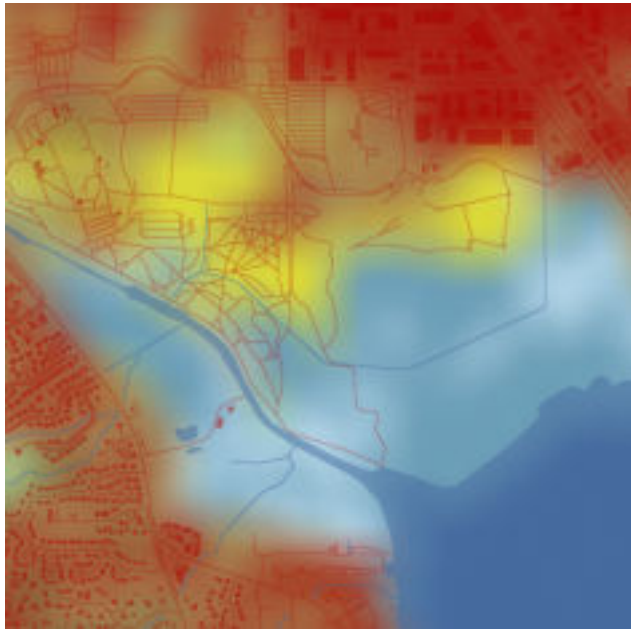

**NLCD Legend**

- Open Water
- Developed Open Space
- Developed Low Intensity
- Developed Med. Intensity
- Developed High Intensity
- Barren Land
- Deciduous Forest
- Evergreen Forest
- Mixed Forest
- Shrub/Scrub
- Grassland/Herbaceous
- Pasture/Hay
- Cultivated Crops
- Woody Wetlands
- Emergent Herbaceous Wetlands

preds using squared loss on soft prior

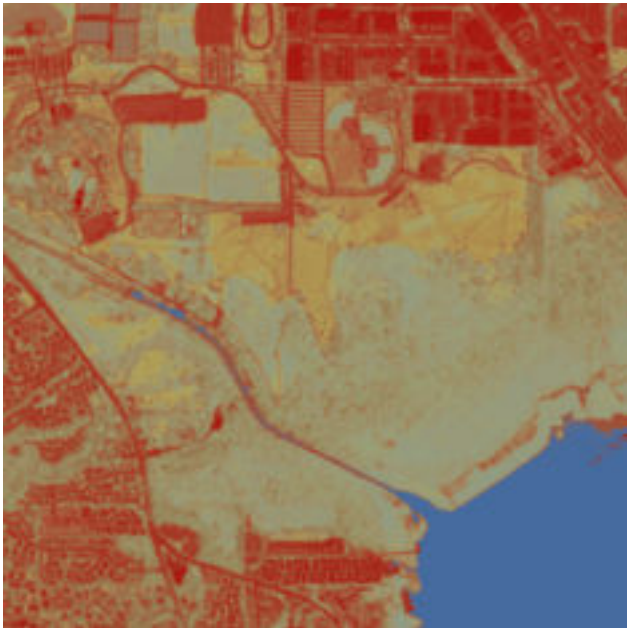

soft prior

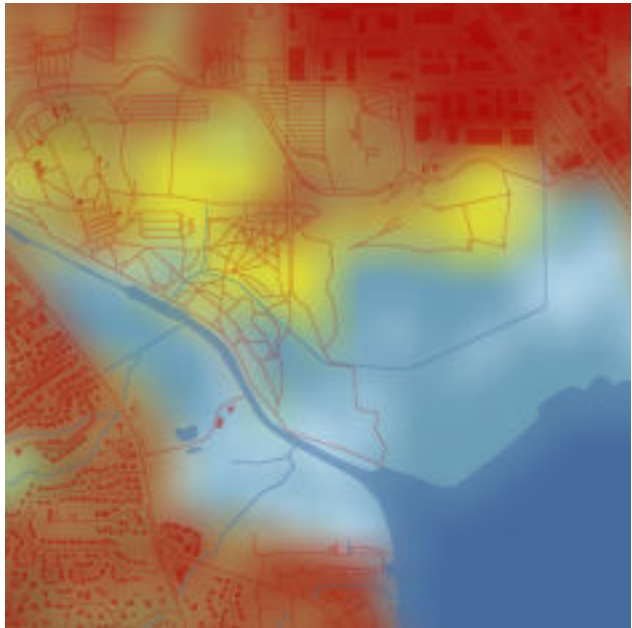

r preds using QR loss

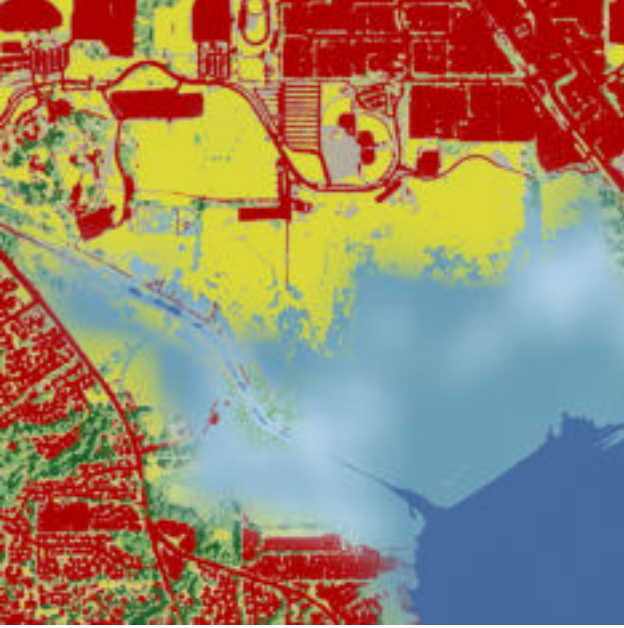

q preds using QR loss

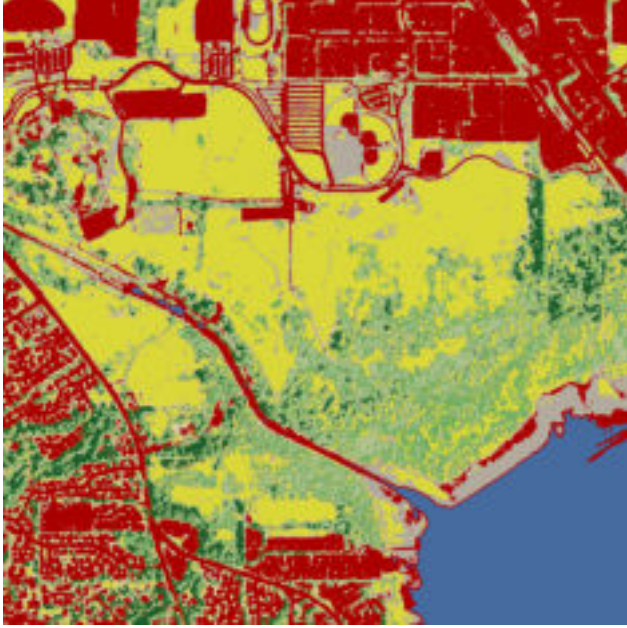

soft prior

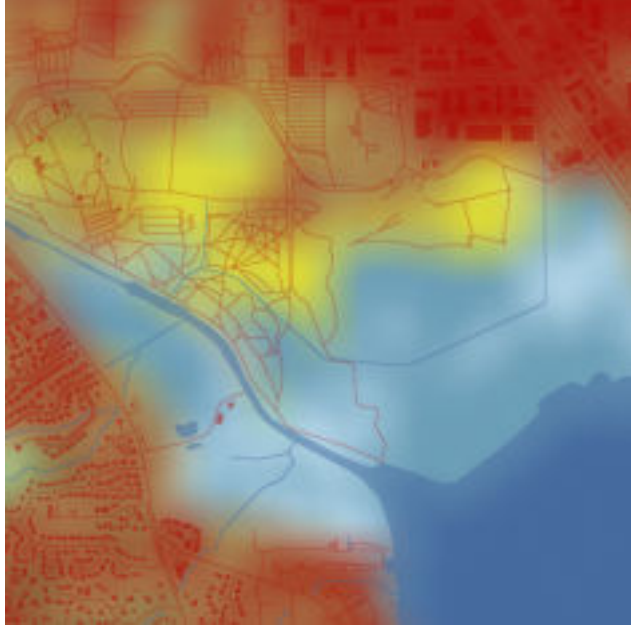

r = preds using RQ loss

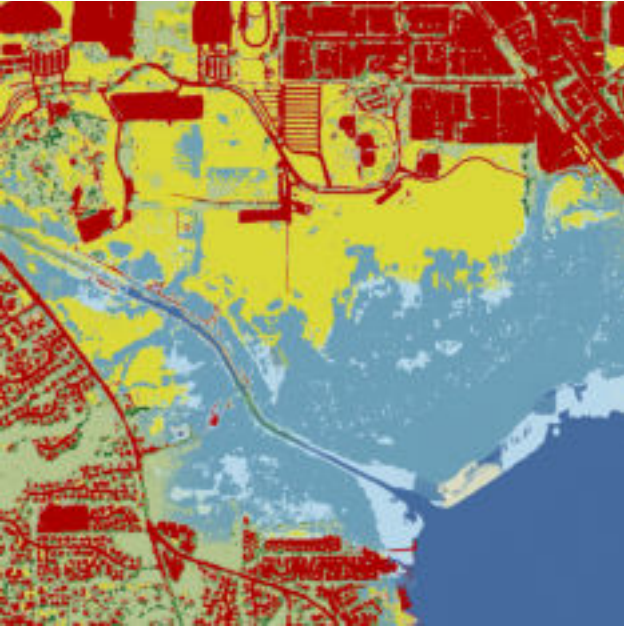

q preds using RQ loss

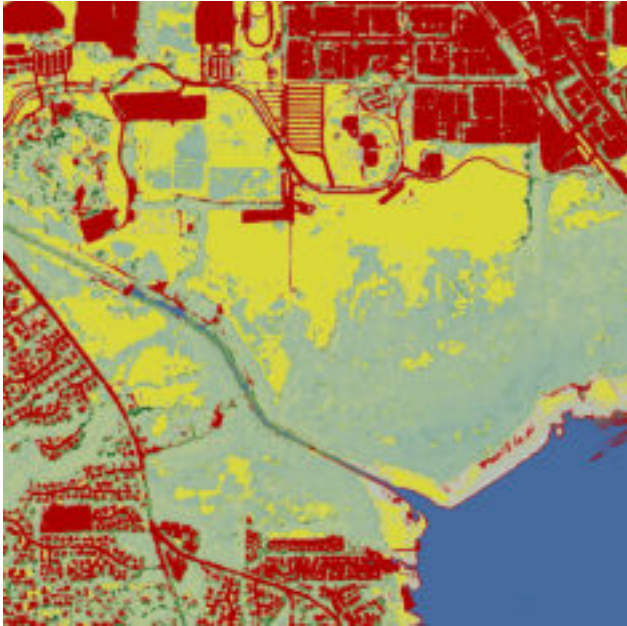

soft prior

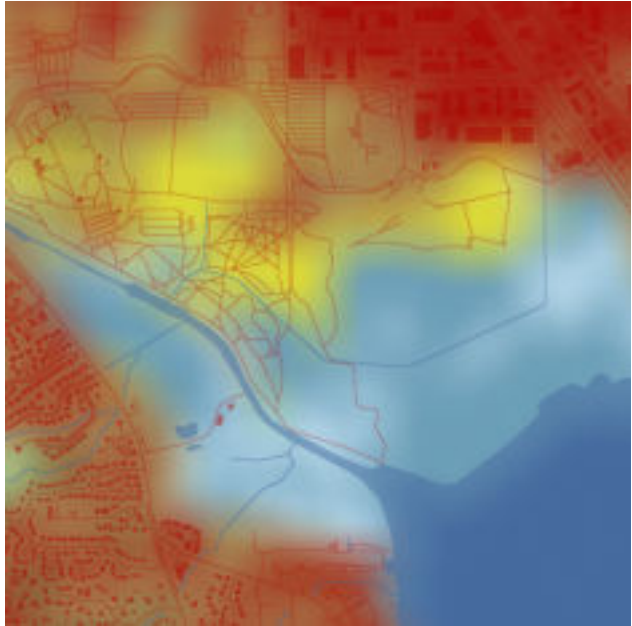

Supplement: supplementary_material [file attachment]
