# Supplementary material
Source: ML conference proceedings conference paper supplement (https://openreview.net/forum?id=rfGNz_Uiqgq)
Supplement: supplementary_material [file attachment]

Chesapeake Conservancy dataset

DE

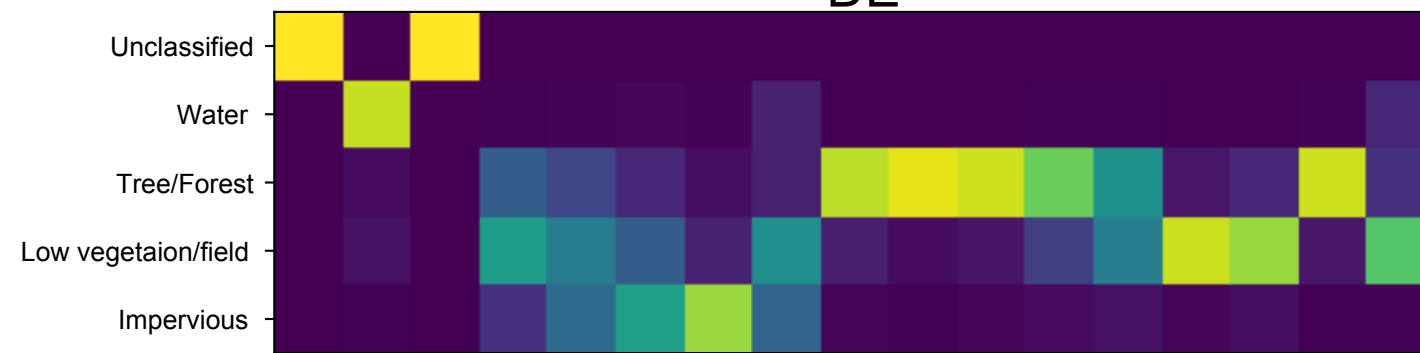

PA

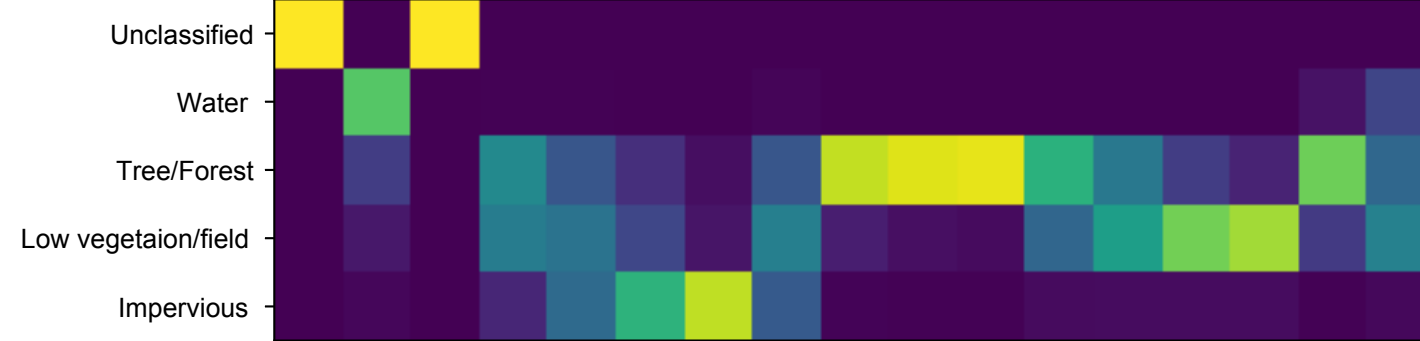

NY

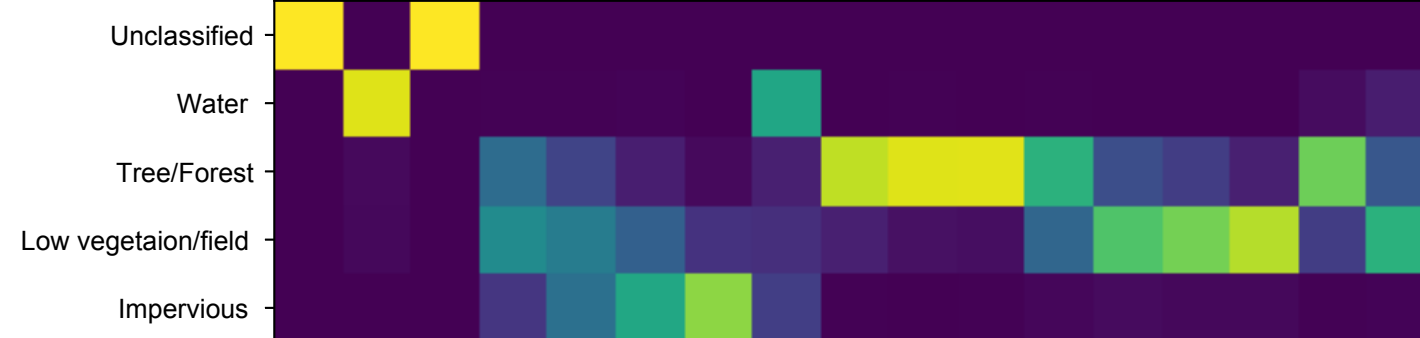

NLCD Class

color scale:

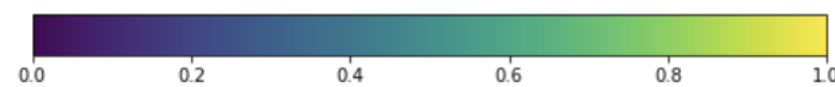

Enviroatlas dataset

Pittsburgh, PA

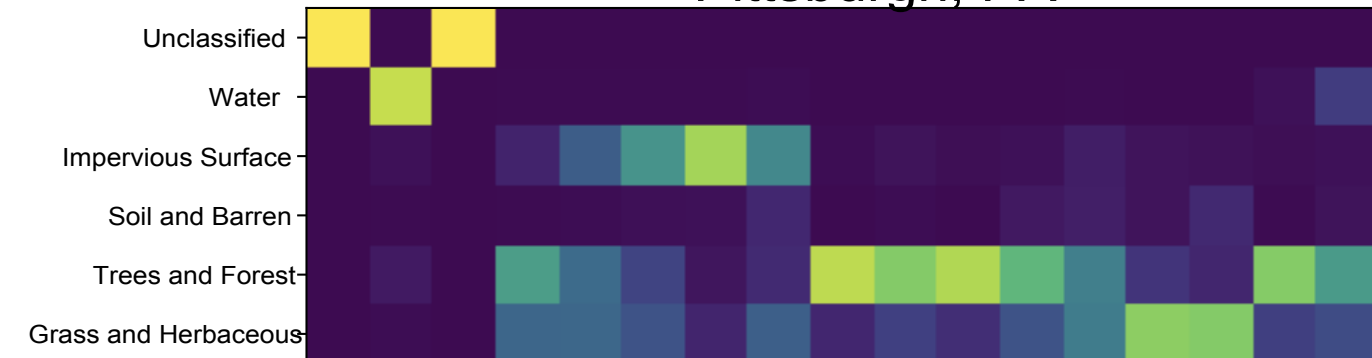

Durham, NC

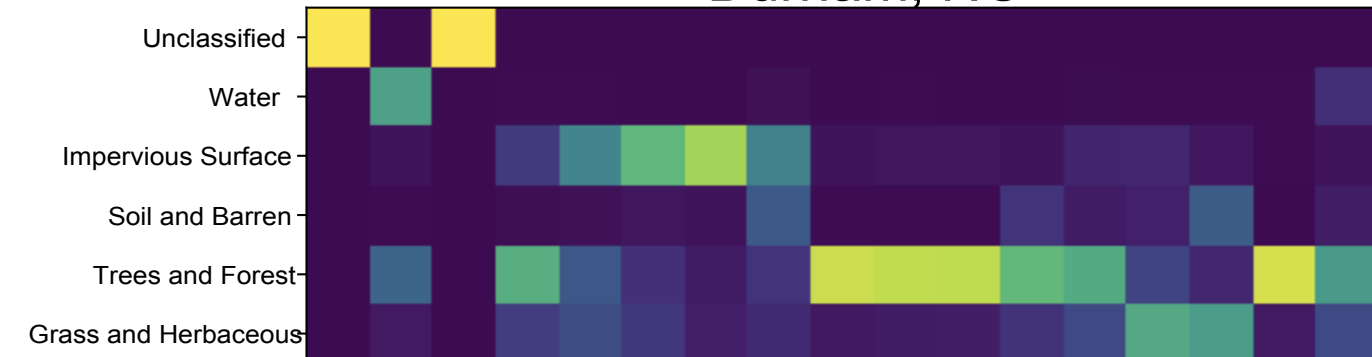

Austin, TX

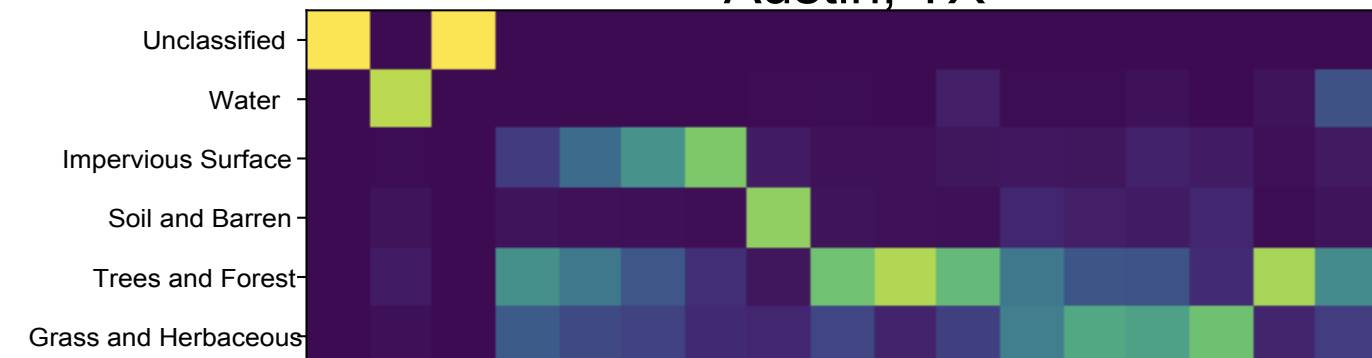

Phoenix, AZ

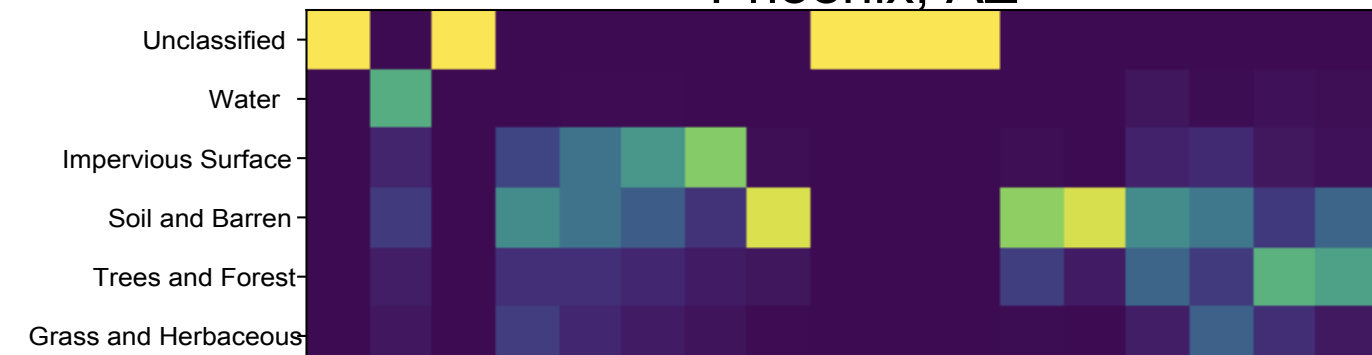

NLCD Class
